**TITLE:** CLINICAL EVALUATION OF THREE MIXED-  
VENOUS OXYGEN SATURATION CATHETERS  
**AUTHORS:** PE Scuderi, MD, DL Bowton, MD,  
JW Meredith, MD, LC Harris, RN,  
J Brockschmidt, MS  
**AFFILIATION:** Depts. of Anesthesia, Medicine,  
Surgery, and Public Health Sciences,  
Wake Forest University Medical Center,  
Winston-Salem, NC 27103

**INTRODUCTION:** Continuous measurement of mixed-venous oxygen saturation ( $SvO_2$ ), using modified pulmonary artery (PA) catheters, has been available for several years. Three different catheters with this capability are available. Performance of two of the catheters has been compared (1,2). There are, however, no controlled clinical trials nor laboratory studies comparing the performance of all three. We compared the clinical accuracy of the three currently available PA oximetry catheter systems.

**METHODS:** Thirty patients gave informed consent to a study approved by our IRB. All patients were studied in the ICU and were randomly assigned to one of three catheters (n=10 for each group). Catheters produced by Abbott Critical Care Systems (A), Baxter Healthcare Corp. (B), and Viggo-Spectramed (V) were studied. All catheters were inserted by one investigator and studied during the next 24 hours. Each catheter was calibrated as recommended by the respective manufacturer. Mixed-venous samples were collected anaerobically q15 min for 3 hrs, q1h for 9

hrs, and at 24 hrs. Samples were analyzed immediately with an IL 282 CO-Oximeter (Instrumentation Laboratory, Lexington, MA). Catheter performance relative to CO-Oximetry was compared by linear regression; bias (mean difference between catheter reading and CO-Oximeter  $SvO_2$ ) and precision (standard deviation of the bias); and ambiguity (absolute sum of bias and precision).

**RESULTS:** Comparison of PA versus CO-Oximetry  $SvO_2$  are displayed in the table.

| STAT TEST        | MANUFACTURER |            |            |
|------------------|--------------|------------|------------|
|                  | A            | B          | V          |
| Regression       | 1.00x-2.11   | 1.04x-8.06 | 1.08x-7.75 |
| $r^2$            | 0.85         | 0.63       | 0.83       |
| Bias ± Precision | -1.98±3.07   | -5.50±3.87 | -2.28±5.24 |
| Ambiguity        | 5.05         | 9.37       | 7.52       |

The data indicate that all three PA  $SvO_2$  catheters correlate with CO-Oximetry and are capable of reflecting mixed venous oxygen saturation. There are, however, substantial differences in performance. The reasons for these differences are not known and will require further study.

#### References

1. Gettinger A, et al: Anesthesiology 1987;66:373
2. Karis JH, et al: J Cardiothorac Anesth 1988;2:440

**TITLE:** IS PULSOXIMETRY USEFULL FOR  
PREOPERATIVE SCREENING OF  
PULMONARY DISORDERS?  
**AUTHORS:** J. Weindler, M.D., M. Schaller, M.D.,  
E.M. Pscheidl, M.D. Georgieff M.D.  
**AFFILIATION:** Anes. Dept., University Erlangen-  
Nuernberg, 8520 Erlangen, F.R.G.

In contrast to arterial blood gas analysis (ABGs) pulse oximetry is a non-invasive, quick and practicable procedure. If changes in oxygenation could be distinguished on the basis of the pulsoximetric saturation ( $SpO_2$ ) and, breathing room air, the  $PaCO_2$  can be evaluated according to the saturation (alveolar air equation), than pulse oximetry could in part replace ABGs and be used to screen patients preoperatively. It was the aim of the study to determine whether pulse oximetry is sufficient to recognize arterial blood gas disorders and whether there is a correlation between  $SpO_2$  and lung function parameters.

During the preoperative pulmonary function testing of all surgical patients, who were admitted to our lung function ambulance from April to August 1989, the following tests were performed (with informed consent and approval by the Human Research Committee, Univ. Erlangen F.R.G.). Breathing room air, oxygen saturation was measured with the Pulse Oximeter Nellcor N10 (Nellcor Incorporated, Hayward, California) and parallel to this an arterial blood gas sample was drawn.  $PaO_2$  and  $PaCO_2$  were determined with the IL System 1302 (IL GMBH, Lexington, Massachusetts), fractional and functional arterial saturation ( $SaO_2$ ) were determined by

Hemoximeter OSM3 (Radiometer, Copenhagen, Denmark). Vital capacity (VC), maximal expiratory flow at 50% (MEF 50) and at 25% (MEF 25) of VC were measured by bodyplethymography (Bodytest, Jäger, Würzburg, F.R.G.) or by flow-volume-loop (Transferscreen, Jäger, Würzburg F.R.G.).

254 patients were studied. The average age of the patients was 58 years. The correlation coefficient of  $SpO_2$  to functional  $SaO_2$  was 0.95. In the range of functional  $SaO_2$  of 92% to 98% the  $SpO_2$  values were 1% below the functional  $SaO_2$ . Defining normal  $PaO_2$  above 70 mmHg, at  $SpO_2 = 95\%$  the sensitivity was 0.99 and the specificity 0.70, at  $SpO_2 = 92\%$  the sensitivity was 0.56 and the specificity 0.99. In the range of  $SpO_2$  above 92% only one patient with  $SpO_2 = 93\%$  had an elevated  $PaCO_2$  of 47 mmHg. Severe  $CO_2$  retention occurred at  $SpO_2$  below 90%. There were significant correlations between functional  $SaO_2$  and the lung function parameters. At functional  $SaO_2 \geq 96\%$  severe disturbances of pulmonary ventilation are not found.

Our results demonstrate, that pulse oximetry is sufficient for screening clinically significant blood gas disorders and therefore optimizing the indication for ABGs. At  $SpO_2 \geq 95\%$  the  $PaO_2$  is in over 99% above 70 mmHG and global insufficiency can be excluded. With increasing pulmonary disorders the alveolo-arterial diffusion gradient rises rapidly and oxygen saturation decreases but reactive hyperventilation ensures normal or reduced  $PaCO_2$  values. Severe pulmonary disorders at  $SaO_2 > 95\%$  can not be expected.
